# Supplementary material
Source: MDPI journal article supplement (https://www.mdpi.com/1424-8247/14/6/583)
Supplement: s1 [file s1]

## ***Supplementary Methods and Materials***

### **Polymer isolation from sample**

Using a beaker, add methanol in a proportion of 1:4 (w:v) to the sample. Afterwards mixture is blended for 5 min and let stand at room temperature for 2h. Then, it is placed at  $-30\text{ }^{\circ}\text{C}$  overnight. Next, the sample is centrifuged at 1250 g for 10 min at room temperature. The Solvent is collected and eliminated in a rotatory evaporator.

### **Shotgun QTOF**

Sample was prepared in isopropanol at 1 mg/mL with 0.1% formic acid. Then, 1  $\mu\text{L}$  was directly injected in Impact II QTOF (Bruker, Karlsruhe, Germany). Ionization voltage was +4.5 kV in positive, end plate offset 0.5 kV mode; nebulizing gas pressure was 1.8 bar (8 L/min) and drying temperature  $220\text{ }^{\circ}\text{C}$ . Spectra were acquired within the range of  $m/z$  150–2000.

### **LC-MS analyses**

Analyses conditions were as reported by Sarafian et al. [1]. Thus, chromatographic analyses were performed using an ELUTE LC series system (Bruker, Karlsruhe, Germany) coupled to an Impact II QTOF (Bruker, Karlsruhe, Germany). Separation of compounds was conducted using a C18 Intensity Solo column (100 mm x 2.1 mm, 2  $\mu\text{m}$ ) at  $55\text{ }^{\circ}\text{C}$  and 0.400 mL/min. A binary mobile system was used for the elutions of compounds i) phase A consists of ACN/ $\text{H}_2\text{O}$  (60:40, v:v) mixed with 10 mM ammonium formate and 0.1% formic acid and ii) mobile phase B IPA/ACN (90:10, v:v) mixed with 10 mM ammonium formate and 0.1% formic acid. Gradient was as described by Sarafian et al [1]. The injection volume was 3  $\mu\text{L}$ . FDR samples treated with methanol were dissolved at a concentration of 0.3 mg/mL in phase B and analyzed in positive mode: Ionization voltage was +4.5 kV, end plate offset 0.5 kV; nebulizing gas pressure was 1.8 bar (8 L/min) and drying temperature  $220\text{ }^{\circ}\text{C}$ ; spectra were acquired within the range of  $m/z$  150–2000.

## Supplementary results

Figure S1. Chromatographic overlay of the triterpene eluting region of the assayed samples.

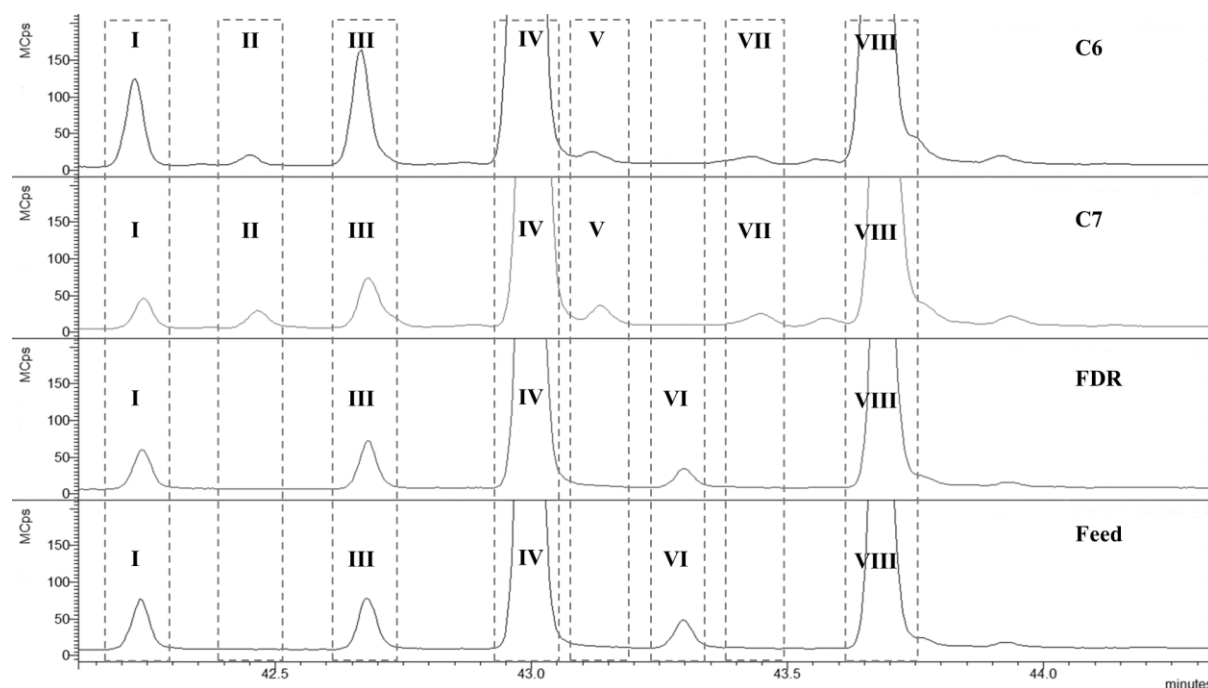

Figure S2. Mass spectra (GC-MS) of triterpene I in the assayed samples.

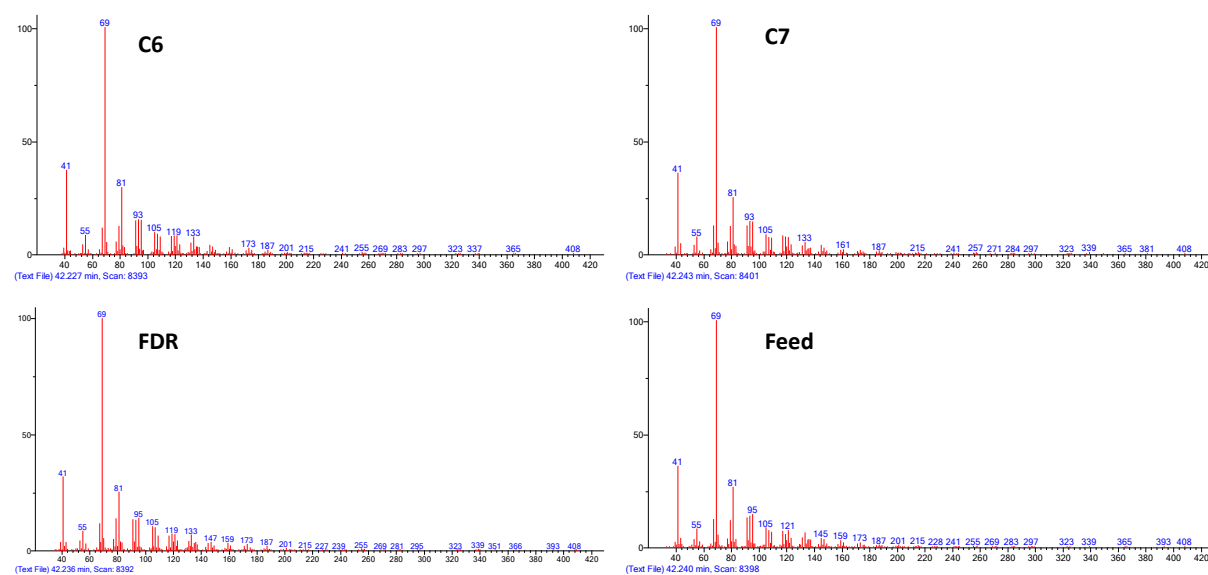

Figure S3. Mass spectra (GC-MS) of triterpene III in the assayed samples.

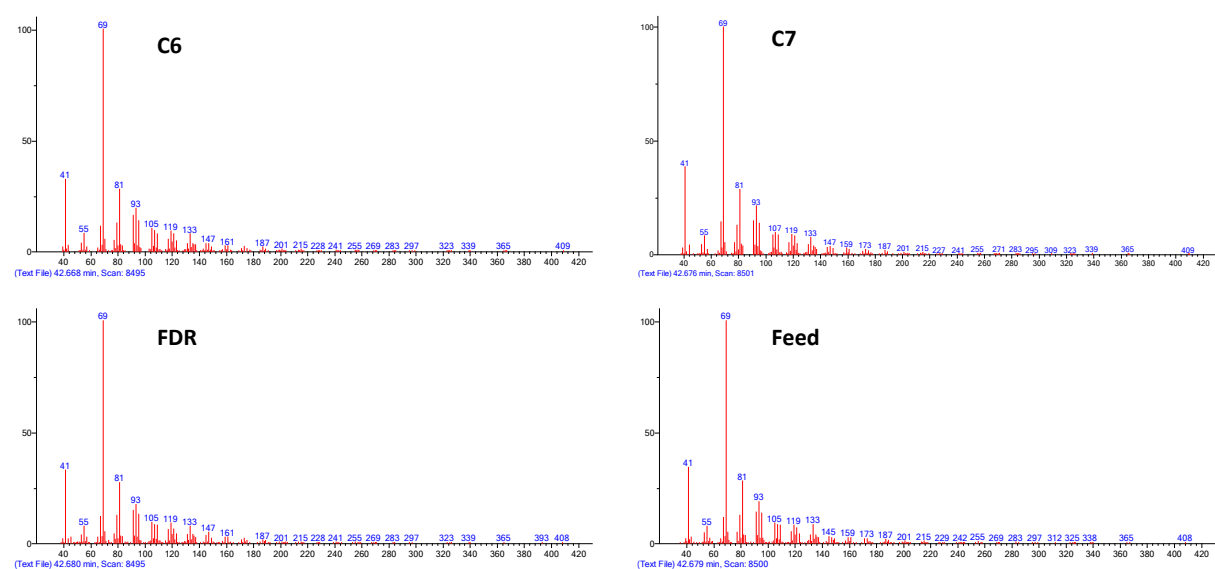

Figure S4. Mass spectra (GC-MS) of triterpene IV in the assayed samples.

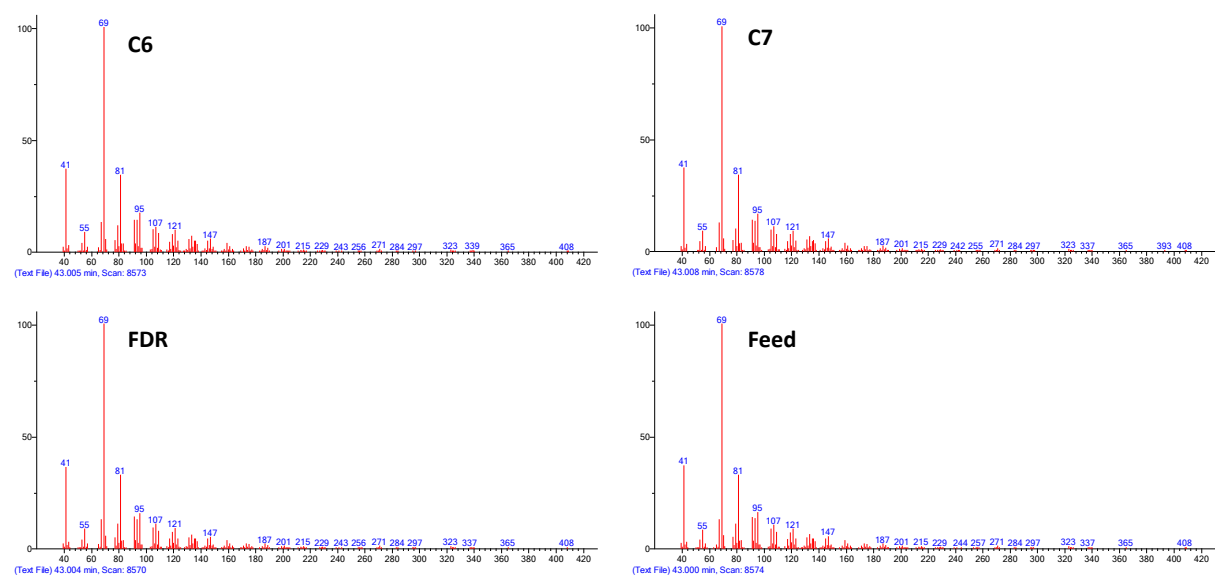

Figure S5. Mass spectra (GC-MS) of triterpene VIII in the assayed samples.

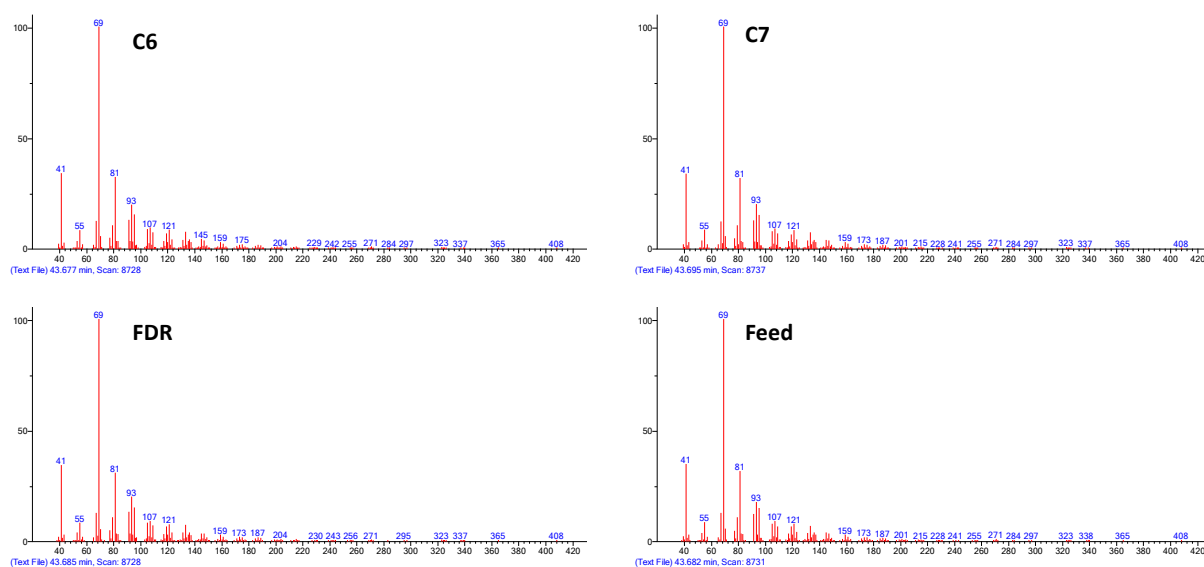

Figure S6. Mass spectra (GC-MS) of squalene (Standard from Sigma).

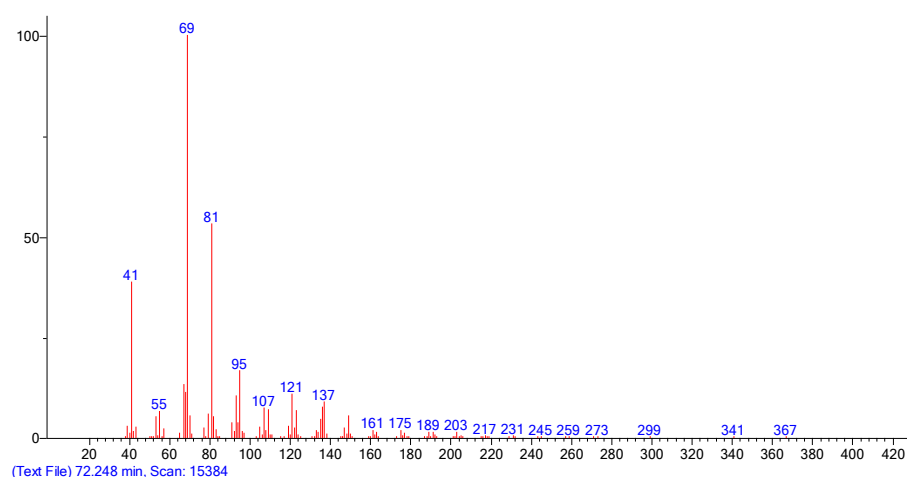

Figure S7. Direct infusion on QTOF of FDR sample treated with methanol showed a gaussian distribution of ions.

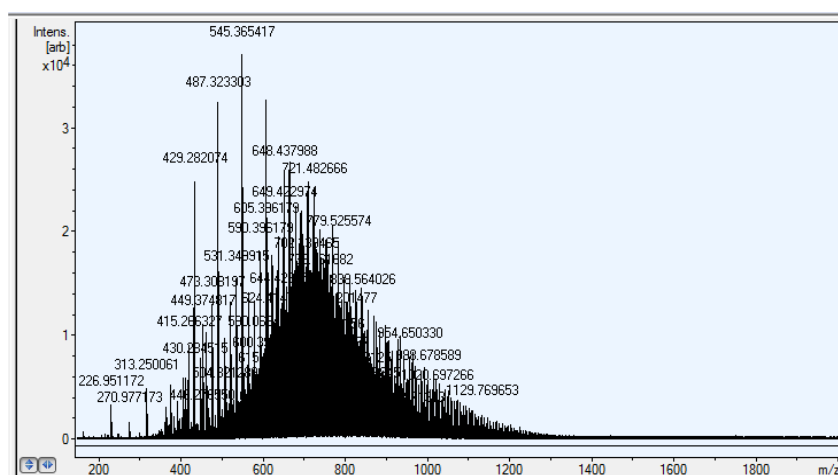

Figure S8. Mass spectra (LC-QTOF) at start (A), middle (B) and end (C) of eluting peak of methanol-treated FDR sample.

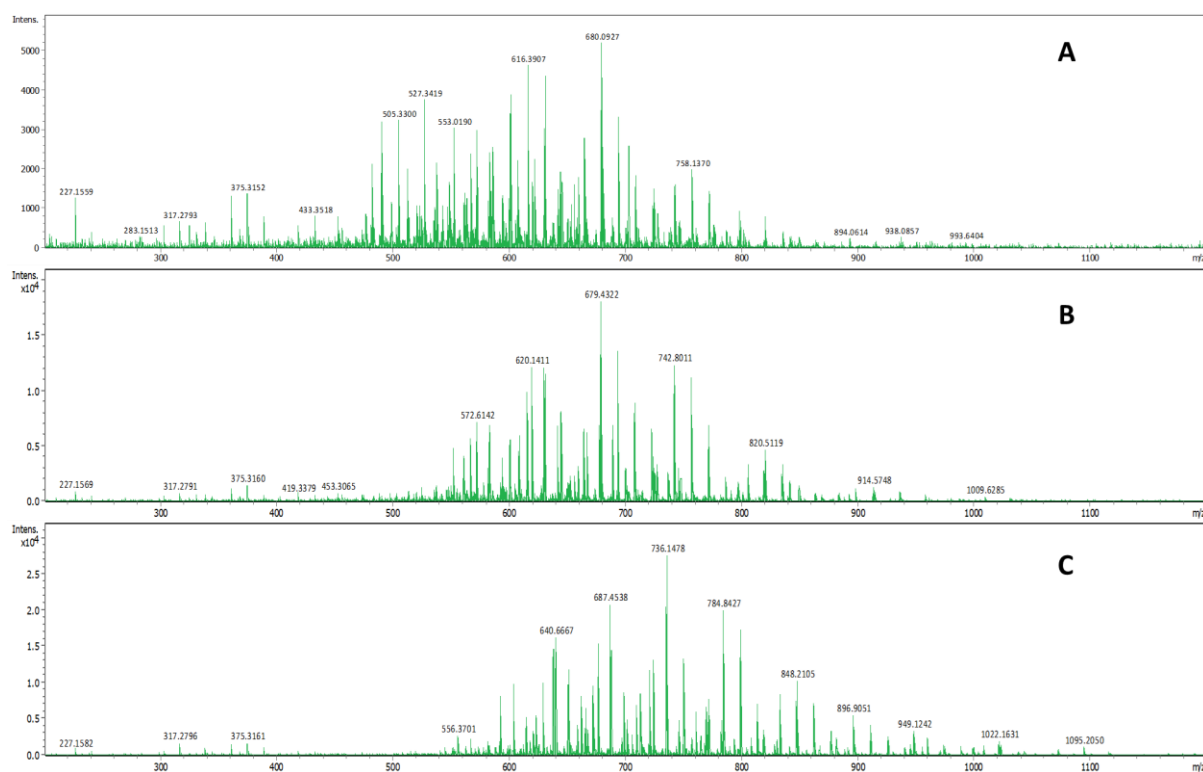

Figure S9. PCA of data obtained from GC-MS (A) and HPLC-ELSD (B).

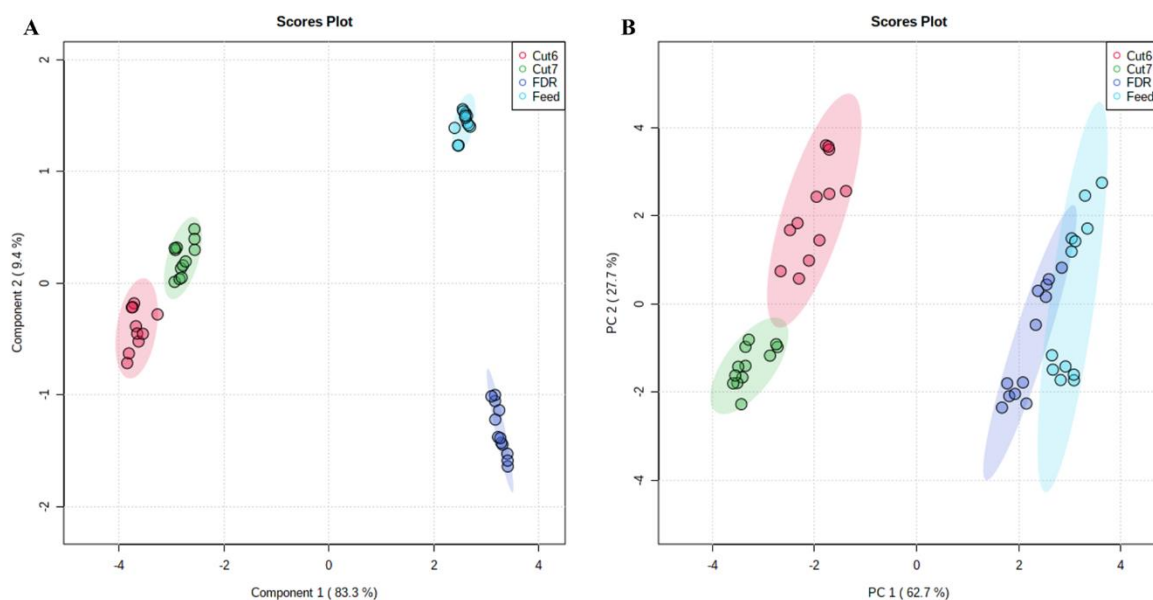

Figure S10. Heatmap of GC-MS data from the assayed samples.

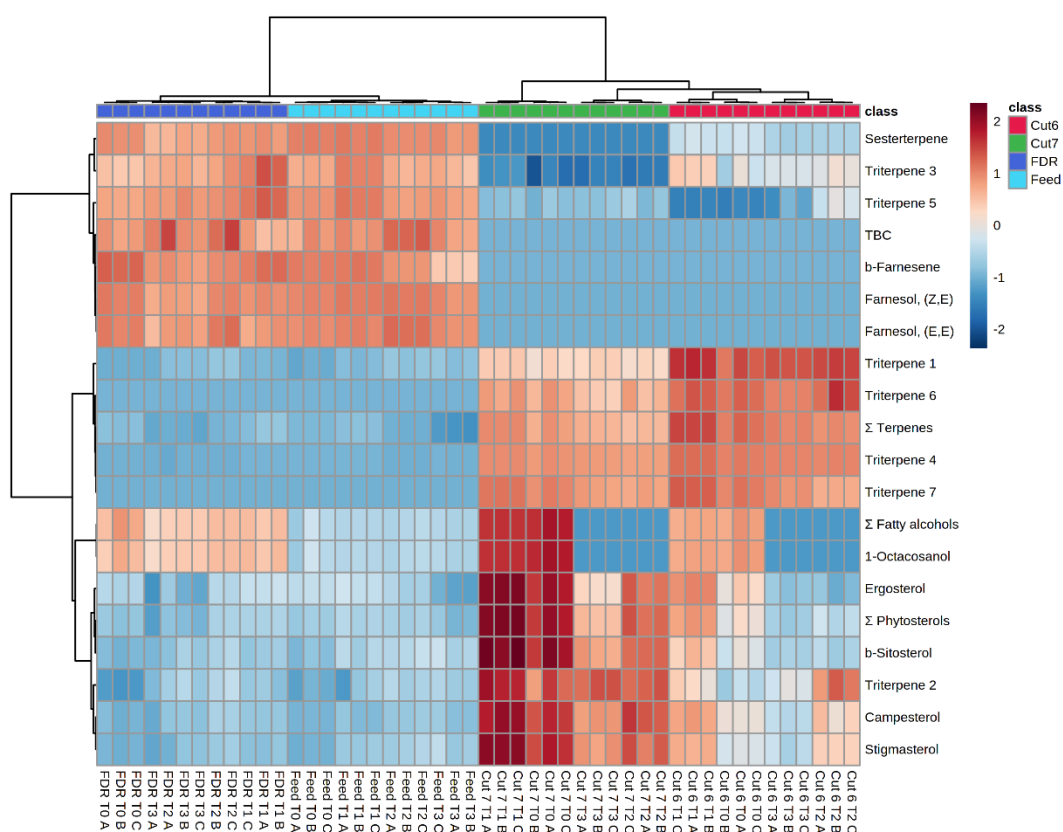

Figure S11. Heatmap of HPLC-ELSD data from the assayed samples.

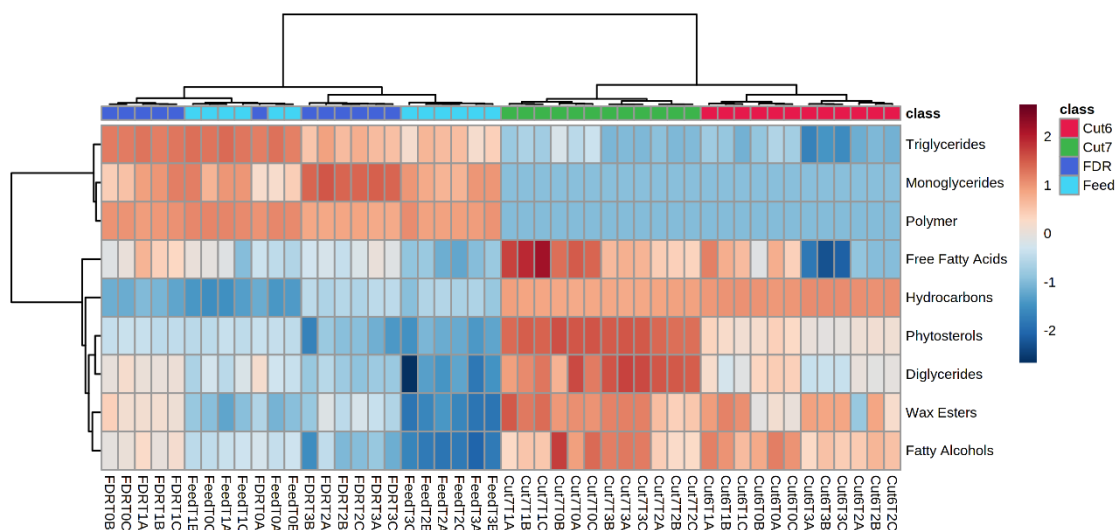

Table S1.Mobile phase gradient (%).

| Time<br>(min.) | Mobile phase (percent) |     |    |    | Flow-rate<br>(mL/min.) |
|----------------|------------------------|-----|----|----|------------------------|
|                | A                      | B   | C  | D  |                        |
| 0.0            | 100                    | 0   | 0  | 0  | 0.275                  |
| 1.5            | 100                    | 0   | 0  | 0  | 0.275                  |
| 1.6            | 97                     | 3   | 0  | 0  | 0.275                  |
| 9.0            | 94                     | 6   | 0  | 0  | 0.275                  |
| 11.0           | 70                     | 30  | 0  | 0  | 0.275                  |
| 14.0           | 45                     | 55  | 0  | 0  | 0.275                  |
| 15.0           | 45                     | 55  | 0  | 0  | 0.275                  |
| 16.0           | 40                     | 55  | 5  | 0  | 0.275                  |
| 20.0           | 35                     | 55  | 10 | 0  | 0.275                  |
| 20.1           | 33                     | 50  | 17 | 0  | 0.275                  |
| 25.0           | 38                     | 45  | 17 | 0  | 0.275                  |
| 25.1           | 48                     | 35  | 17 | 0  | 0.275                  |
| 30.0           | 53                     | 30  | 17 | 0  | 0.275                  |
| 40.0           | 40                     | 0   | 60 | 0  | 0.275                  |
| 40.1           | 0                      | 100 | 0  | 0  | 0.275                  |
| 42.0           | 0                      | 100 | 0  | 0  | 0.275                  |
| 42.1           | 50                     | 0   | 0  | 50 | 0.275                  |
| 45.0           | 50                     | 0   | 0  | 50 | 0.275                  |
| 47.0           | 100                    | 0   | 0  | 0  | 0.275                  |
| 55.0           | 100                    | 0   | 0  | 0  | 0.275                  |

Table S2. FTIR frequencies interpretation table.

| Wavenumber (cm <sup>-1</sup> ) | Origin                                                       | Assignment                                   |
|--------------------------------|--------------------------------------------------------------|----------------------------------------------|
| 3486-3390                      | -OH stretching                                               | Alcohols                                     |
| 2969-2849                      | C-H stretching (-CH <sub>3</sub> , -CH <sub>2</sub> and -CH) | Aliphatic chains                             |
| 1741-1738                      | -C=O stretching                                              | Esters, Carboxylic Acids, Ketones, Aldehydes |
| 1714-1712                      | -OH bending                                                  | Alcohols                                     |
| 1671<br>1641                   | C=C stretching                                               | Unsaturated aliphatic chains                 |
| 1595                           | RONH <sub>2</sub>                                            | Amines                                       |
| 1451-1374                      | C-H bending                                                  | Aliphatic chains                             |
| 1347                           | CH <sub>3</sub> deformation                                  | Aliphatic chains                             |
| 1297                           | (unsat.) -CH deformation                                     | Unsaturated aliphatic chains                 |
| ~1251                          | CH <sub>3</sub> symmetric deformation                        | Aliphatic chains                             |
| 1108-1102<br>1014              | CH <sub>3</sub> CO Rocking                                   | Ketones                                      |
| 984                            | CH deformation                                               | Aliphatic chains                             |
| 904-892                        | CH deformation (out of plane)                                | Aliphatic chains                             |
| ~888                           | CH <sub>2</sub> out of plane deformation                     | Unsaturated aliphatic chains                 |
| 836-833                        | CH <sub>2</sub> rocking vibration                            | Aliphatic chains                             |
| 744                            | CH <sub>2</sub> twisting                                     | Unsaturated aliphatic chains                 |
| 719                            | Rotational deformation of CH <sub>2</sub> in chain           | High aliphatic chains                        |



Table S3. Quantification of IL-1 $\beta$ , IL-6, IL-8 and TNF- $\alpha$  levels in macrophages without and with inflammatory stimulus (LPS).

|                                | No stimulus        | LPS stimulus        |
|--------------------------------|--------------------|---------------------|
| <b>IL-1<math>\beta</math></b>  |                    |                     |
| Untreated cells                | 0.38 $\pm$ 0.08    | 6.32 $\pm$ 0.19     |
| Ibuprofen                      | -                  | 8.47 $\pm$ 0.36***  |
| C6 T0                          | 0.25 $\pm$ 0.05    | 7.15 $\pm$ 0.23     |
| C6 T3                          | 0.32 $\pm$ 0.06    | 7.40 $\pm$ 0.56     |
| C7 T0                          | 0.18 $\pm$ 0.08    | 6.98 $\pm$ 0.15     |
| C7 T3                          | 0.18 $\pm$ 0.05    | 7.10 $\pm$ 0.11     |
| <b>IL-6</b>                    |                    |                     |
| Untreated cells                | n.d.               | 76.8 $\pm$ 7.4      |
| Ibuprofen                      | -                  | 24.9 $\pm$ 5.0****  |
| C6 T0                          | n.d.               | 5.00 $\pm$ 0.26**** |
| C6 T3                          | n.d.               | 4.40 $\pm$ 0.40**** |
| C7 T0                          | n.d.               | 5.05 $\pm$ 0.40**** |
| C7 T3                          | n.d.               | 4.58 $\pm$ 0.67**** |
| <b>IL-8</b>                    |                    |                     |
| Untreated cells                | 17.4 $\pm$ 0.9     | 219 $\pm$ 32        |
| Ibuprofen                      | -                  | 195 $\pm$ 31        |
| C6 T0                          | 24.5 $\pm$ 0.1**** | 255 $\pm$ 44        |
| C6 T3                          | 28.8 $\pm$ 0.6**** | 237 $\pm$ 44        |
| C7 T0                          | 22.3 $\pm$ 0.7***  | 221 $\pm$ 38        |
| C7 T3                          | 18.9 $\pm$ 0.4     | 236 $\pm$ 48        |
| <b>TNF-<math>\alpha</math></b> |                    |                     |
| Untreated cells                | 0.42 $\pm$ 0.05    | 96.7 $\pm$ 6.9      |
| Ibuprofen                      | -                  | 76.0 $\pm$ 4.8      |
| C6 T0                          | 0.40 $\pm$ 0.01    | 60.2 $\pm$ 8.1**    |
| C6 T3                          | 0.45 $\pm$ 0.06    | 57.7 $\pm$ 6.4**    |
| C7 T0                          | 0.28 $\pm$ 0.02    | 58.9 $\pm$ 8.7**    |
| C7 T3                          | 0.20 $\pm$ 0.04**  | 56.0 $\pm$ 7.4**    |

Values are expressed as pg of cytokine normalized to the total protein content. Ibuprofen at 1 mM was used as an anti-inflammatory control. One-way ANOVA was used for statistical analyses.

## Supplementary References

1. Sarafian, M.H.; Gaudin, M.; Lewis, M.R.; Martin, F.P.; Holmes, E.; Nicholson, J.K.; Dumas, M.E. Objective set of criteria for optimization of sample preparation procedures for ultra-high throughput untargeted blood plasma lipid profiling by ultra performance liquid chromatography-mass spectrometry. *Anal. Chem.* **2014**, *86*, 5766–5774, doi:10.1021/ac500317c.
